# Supplementary material for: Brief interventions for cannabis use in emerging adults: protocol for a systematic review, meta-analysis, and evidence map
Source: PubMed Central journal article supplement (PMC6060526; doi:10.1186/s13643-018-0772-z), 2018-07-25
Supplement: 13643_2018_772_MOESM2_ESM.pdf [file 13643_2018_772_MOESM2_ESM.pdf]

Screening Form  
(Draft 1 – not piloted)

**1. POPULATION**

*Exclude if population restricts to:*

- Older adults
- Children
- i.e. exclude if individuals between the ages of 15 and 25 are not included in the study.

**2. DESIGN**

**Is the study design a randomized controlled trial or a quasi-experimental study?**

If yes, go to next question.

- If no and indicates another study design (e.g. systematic review, book chapter), exclude.

**3. INTERVENTION**

**i) Is the intervention of interest a brief intervention (i.e. 1 session)?**

- If yes or unsure, continue intervention assessment.
- If included additional “booster” sessions but they report outcomes following the single sessions, continue intervention assessment.
- If no, exclude.

**ii) Is the intervention focused on illicit substance use or cannabis use?**

- If yes or unsure, continue intervention assessment.
- If focused on alcohol or not on substance use, exclude.

**4. CONTROL**

**Is the comparator a within subjects pre-post test, passive-control** (wait-list control, no intervention, treatment as usual), **or active control** (i.e. educational sessions, handouts)?

- If yes or unsure, continue to outcome assessment.
- If no, exclude.

**5. OUTCOME**

**Is there an outcome on:**

- **Cannabis related outcomes**
  - **Other substance use related outcomes**
  - **Mental health related outcomes**
  - **Academic or Occupational outcome**
- If yes, include.
  - If no, exclude.
