# Supplementary material for: Brief interventions for cannabis use in emerging adults: protocol for a systematic review, meta-analysis, and evidence map
Source: Springer Nature journal article supplement (doi:10.1186/s13643-018-0772-z), 2018-07-25
Supplement: MOESM1 [file 15978322]

## Search Strategies

| Database        | Intervention for MJ                                                                                                                                                                                                                                                                                                                                                                                                                                                                                                            |
|-----------------|--------------------------------------------------------------------------------------------------------------------------------------------------------------------------------------------------------------------------------------------------------------------------------------------------------------------------------------------------------------------------------------------------------------------------------------------------------------------------------------------------------------------------------|
| OVID<br>MEDLINE | <p>brief intervention.mp. OR explode motivational interviewing/ OR motivational enhancement.mp. OR motivational interviewing.mp. OR OR SBIRT.mp. OR Psychotherapy, Brief/ OR risk reduction.mp. OR harm reduction.mp. OR Harm Reduction/</p> <p>AND</p> <p>Marijuana Abuse/ OR Marijuana Smoking/ OR Medical Marijuana/ OR Cannabis/ OR cannabis*.mp. OR marijuana*.mp. OR THC.mp. OR hash.mp. OR marihuana.mp.</p>                                                                                                            |
| EMBASE          | <p>brief intervention.mp. OR explode motivational interviewing/ OR motivational interviewing.mp. OR motivational enhancement.mp. OR SBIRT.mp. OR short term psychotherapy/ OR risk reduction.mp. OR OR Risk Reduction/ OR harm reduction.mp. OR OR Harm Reduction/</p> <p>AND</p> <p>Cannabis/ OR marijuana*.mp. OR Cannabis Addiction/ OR “Cannabis Use”/ OR Cannabis Smoking/ OR Medical Cannabis/ or cannabis*.mp.<br/>OR tetrahydrocannabinolic acid/ OR THC.mp. OR tetrahydrocannabinol/ OR hash.mp. OR marihuana.mp.</p> |
| PsychInfo       | <p>Brief intervention.mp. OR explode motivational interviewing/ OR motivational interviewing.mp. OR motivational enhancement.mp. OR SBIRT.mp. OR explode Brief Psychotherapy/ OR risk reduction.mp. OR explode Harm Reduction/ OR harm reduction.mp.</p> <p>AND</p> <p>Cannabis/ OR marijuana*.mp. OR Marijuana/ OR Marijuana usage/ or cannabis*.mp. OR explode Hashish/ OR THC.mp. OR tetrahydrocannabinol/ OR hash.mp. OR marihuana.mp.</p>                                                                                 |
| AMED            | <p>Brief intervention.mp. OR motivational interviewing.mp. OR motivational enhancement.mp. OR risk reduction.mp. OR harm reduction.mp.</p> <p>AND</p> <p>explode Cannabis/ OR cannabis.mp. OR marijuana.mp. OR hash.mp. OR THC.mp. OR marihuana.mp</p>                                                                                                                                                                                                                                                                         |
| CINAHL          | <p>(MH ‘Psychotherapy, Brief’) OR “brief intervention” OR (MH “Motivational Interviewing”) OR “motivational interviewing” OR “Motivational enhancement” OR “SBIRT” Or “Screening, brief</p>                                                                                                                                                                                                                                                                                                                                    |

|                                    |                                                                                                                                                                                                                                                                        |
|------------------------------------|------------------------------------------------------------------------------------------------------------------------------------------------------------------------------------------------------------------------------------------------------------------------|
|                                    | <p>intervention, and referral to treatment” OR “Risk Reduction”</p> <p>AND</p> <p>(MH “Harm Reduction”) PR “Harm reduction” or (MH “Cannabis”) OR “cannabis” OR (MH “Medical Marijuana”) OR “marijuana” OR “marihuana.”</p>                                            |
| Cochrane Clinical Trials (CENTRAL) | <p>Marijuana Motivation (zero results)</p> <p>Cannabis Motivation</p>                                                                                                                                                                                                  |
| Clinical Trials.gov                | <p>Cannabis (includes marihuana, cannabinoids, sativex, weed, GW 100, naiximols, Pot) Child, Adult studies that accept health volunteers</p>                                                                                                                           |
| Current Controlled Trials          | <p>Motivational Interviewing OR motivational enhancement or brief intervention</p> <p>AND</p> <p>Marijuana or cannabis</p>                                                                                                                                             |
| SAMHSA                             | <p>Any brief intervention trials</p>                                                                                                                                                                                                                                   |
| Proquest dissertations             | <p>Motivational Interviewing OR motivational enhancement or brief intervention</p> <p>AND</p> <p>Marijuana or cannabis</p>                                                                                                                                             |
| WHO portal                         | <p>Motivational Interviewing OR motivational enhancement or brief intervention</p> <p>AND</p> <p>Marijuana or cannabis</p>                                                                                                                                             |
| Google Scholar                     | <p>Cannabis Brief intervention</p> <p>Cannabis Motivational Interviewing</p> <p>Cannabis Motivational Enhancement</p> <p>Marijuana Brief Intervention</p> <p>Marijuana Motivational Interviewing</p> <p>Marijuana Motivational Enhancement</p>                         |
| OpenGrey                           | <p>Cannabis Brief intervention (1)</p> <p>Cannabis Motivational Interviewing (0)</p> <p>Cannabis Motivational Enhancement (0)</p> <p>Marijuana Brief Intervention (0)</p> <p>Marijuana Motivational Interviewing (0)</p> <p>Marijuana Motivational Enhancement (0)</p> |
